# Supplementary material for: Perceived Social Support Increases Creativity: Experimental Evidence
Source: MDPI journal article supplement (doi:10.3390/ijerph191811841), 2022-09-19
Supplement: s1 [file s1]

## SOCIAL SUPPORT AND CREATIVITY

Table S1

*Mean and Standard Deviation of the Log-transformed Creativity Measures in the Experimental and Control Groups*

| No. | Variable              | Experimental ( <i>n</i> = 69) |           | Control ( <i>n</i> = 66) |           |
|-----|-----------------------|-------------------------------|-----------|--------------------------|-----------|
|     |                       | Mean                          | <i>SD</i> | Mean                     | <i>SD</i> |
| 1   | Fluency               | 1.13                          | 0.31      | 1.00                     | 0.30      |
| 2   | Flexibility           | 1.00                          | 0.29      | 0.87                     | 0.27      |
| 3   | Originality           | 1.31                          | 0.35      | 1.11                     | 0.35      |
| 4   | Self-rated creativity | 0.57                          | 0.05      | 0.54                     | 0.05      |

*Note.* *N* = 135. All differences between the means in both groups are statistically significant at .05 level.
